# Supplementary material for: Physical workload and increased frequency of musculoskeletal pain: a cohort study of employed men and women with baseline occasional pain
Source: HighWire-hosted journal article supplement (doi:10.1136/oemed-2020-107094), 2021-01-17
Supplement: oemed-2020-107094supp001_data_supplement.pdf [file oemed-2020-107094supp001_data_supplement.pdf]

## Appendix 1

| <b>Physical JEM Questions (translated from Swedish)</b> |                                                                                                                                                                   | <b>Response options</b>                                                                                                                                                                                                                                                         |
|---------------------------------------------------------|-------------------------------------------------------------------------------------------------------------------------------------------------------------------|---------------------------------------------------------------------------------------------------------------------------------------------------------------------------------------------------------------------------------------------------------------------------------|
| Heavy lifting (at least 15kg)                           | Do you have to lift at least 15 kg at a time several times a day?                                                                                                 | a. Every day<br>b. A couple of days per week<br>c. One day per week<br>d. A few days per month<br>e. Not at all / rarely<br><br>a. Almost all the time<br>b. About ¾ of the time<br>c. Half the time<br>d. About ¼ of the time<br>e. About 1/10 of the time<br>f. No not at all |
| Physically strenuous work                               | Does your work sometimes involve physically strenuous work, i.e. that you strain your body more than when you are walking and standing and moving in a usual way? |                                                                                                                                                                                                                                                                                 |
| Fast breathing                                          | Are you exerting yourself in a way that makes you breathe faster?                                                                                                 |                                                                                                                                                                                                                                                                                 |
| Forward bent position                                   | Are you sometimes working in forward bent positions, while not using support from your hands or arms?                                                             |                                                                                                                                                                                                                                                                                 |
| Twisted position                                        | Are you sometimes working in twisted positions?                                                                                                                   |                                                                                                                                                                                                                                                                                 |
| Hands above shoulder level                              | Are you sometimes working with your hands at shoulder height or above?                                                                                            |                                                                                                                                                                                                                                                                                 |
| Repetitive work                                         | Does your work sometimes require that you merely repeat the same work movements, at least twice per minute?                                                       |                                                                                                                                                                                                                                                                                 |
| Frequent bending or twisting                            | In your work, do you bend or twist in the same way many times per hour and for several hours during the same day?                                                 |                                                                                                                                                                                                                                                                                 |
| <b>Psychosocial JEM questions</b>                       | <b>Response options</b>                                                                                                                                           |                                                                                                                                                                                                                                                                                 |
| Decision Authority                                      | Can you partially decide for yourself when different tasks are to be done?                                                                                        | a. Always<br>b. Mostly<br>c. Mostly not<br>d. Never                                                                                                                                                                                                                             |
|                                                         | Do you have the opportunity to decide your own work rate?                                                                                                         |                                                                                                                                                                                                                                                                                 |
|                                                         | Can you take short breaks almost at any time to talk?                                                                                                             |                                                                                                                                                                                                                                                                                 |
|                                                         | Does it happen that you are involved and decide on the structure of your work?                                                                                    |                                                                                                                                                                                                                                                                                 |

**Appendix 2.** Prevalence of covariates in different levels of physical workload measured by the JEM index score for the sample used to create quartiles of work-related exposures based on the JEMs\*

|                                              |                        | Male workers   |      |                      |      |                       |      |                 |      |                  |             | Female workers |      |                       |      |                        |      |                |      |                  |             |
|----------------------------------------------|------------------------|----------------|------|----------------------|------|-----------------------|------|-----------------|------|------------------|-------------|----------------|------|-----------------------|------|------------------------|------|----------------|------|------------------|-------------|
|                                              |                        | Low<br>n= 2087 |      | Medium-low<br>n=2063 |      | Medium-high<br>n=2068 |      | High<br>n= 2164 |      | Total<br>n= 8382 |             | Low<br>n=2313  |      | Medium-low<br>n= 2215 |      | Medium-<br>high n=2183 |      | High<br>n=2141 |      | Total<br>n= 8852 |             |
|                                              |                        | n              | %    | n                    | %    | n                     | %    | n               | %    | n                | %           | n              | %    | n                     | %    | n                      | %    | n              | %    | n                | %           |
| <b>Age</b>                                   | 18–29                  | 99             | 4,7  | 166                  | 8,0  | 284                   | 13,7 | 386             | 18,0 | <b>935</b>       | <b>11,2</b> | 155            | 6,7  | 204                   | 9,2  | 334                    | 15,3 | 510            | 24,0 | <b>1203</b>      | <b>13,6</b> |
|                                              | 30–39                  | 630            | 30,2 | 624                  | 30,2 | 497                   | 24,0 | 498             | 23,2 | <b>2249</b>      | <b>26,9</b> | 627            | 27,1 | 611                   | 27,6 | 526                    | 24,1 | 485            | 22,8 | <b>2249</b>      | <b>25,5</b> |
|                                              | 40–49                  | 573            | 27,5 | 553                  | 26,8 | 561                   | 27,1 | 577             | 26,8 | <b>2264</b>      | <b>27,1</b> | 714            | 30,9 | 562                   | 25,4 | 563                    | 25,8 | 524            | 24,7 | <b>2363</b>      | <b>26,8</b> |
|                                              | 50–59                  | 535            | 25,6 | 491                  | 23,8 | 489                   | 23,6 | 497             | 23,1 | <b>2012</b>      | <b>24,0</b> | 569            | 24,6 | 589                   | 26,7 | 564                    | 25,8 | 452            | 21,3 | <b>2174</b>      | <b>24,6</b> |
|                                              | 60+                    | 250            | 12,0 | 229                  | 11,1 | 237                   | 11,5 | 192             | 8,9  | <b>908</b>       | <b>10,9</b> | 248            | 10,7 | 244                   | 11,0 | 196                    | 9,0  | 153            | 7,2  | <b>841</b>       | <b>9,5</b>  |
| <b>Completed Education</b>                   | Primary (1,9years)     | 48             | 2,4  | 124                  | 6,2  | 313                   | 15,4 | 525             | 25,1 | <b>1010</b>      | <b>12,4</b> | 75             | 3,3  | 173                   | 8,0  | 178                    | 8,3  | 417            | 20,1 | <b>843</b>       | <b>9,7</b>  |
|                                              | Secondary (12years)    | 415            | 20,4 | 800                  | 39,7 | 1019                  | 50,1 | 1322            | 63,3 | <b>3556</b>      | <b>43,5</b> | 528            | 23,5 | 922                   | 42,4 | 827                    | 38,5 | 1316           | 63,5 | <b>3593</b>      | <b>41,5</b> |
|                                              | Tertiary (12+ years)   | 1576           | 77,3 | 1091                 | 54,1 | 702                   | 34,5 | 243             | 11,6 | <b>3612</b>      | <b>44,2</b> | 1647           | 73,2 | 1081                  | 49,7 | 1145                   | 53,3 | 340            | 16,4 | <b>4213</b>      | <b>48,7</b> |
| <b>Long term health condition</b>            | No                     | 1654           | 79,6 | 1573                 | 76,8 | 1555                  | 75,9 | 1594            | 74,9 | <b>6376</b>      | <b>76,8</b> | 1766           | 77,0 | 1701                  | 77,7 | 1632                   | 75,7 | 1587           | 75,8 | <b>6686</b>      | <b>76,6</b> |
|                                              | Yes                    | 423            | 20,4 | 475                  | 23,2 | 493                   | 24,1 | 533             | 25,1 | <b>1924</b>      | <b>23,2</b> | 527            | 23,0 | 489                   | 22,3 | 524                    | 24,3 | 508            | 24,2 | <b>2048</b>      | <b>23,4</b> |
| <b>Psychological distress (GHQ12 &gt; 3)</b> | No                     | 1762           | 85,0 | 1777                 | 87,1 | 1756                  | 85,7 | 1852            | 87,2 | <b>7147</b>      | <b>86,2</b> | 1835           | 80,1 | 1795                  | 82,0 | 1711                   | 79,1 | 1653           | 78,5 | <b>6994</b>      | <b>79,9</b> |
|                                              | Yes                    | 311            | 15,0 | 264                  | 12,9 | 293                   | 14,3 | 273             | 12,8 | <b>1141</b>      | <b>13,8</b> | 457            | 19,9 | 393                   | 18,0 | 452                    | 20,9 | 452            | 21,5 | <b>1754</b>      | <b>20,1</b> |
| <b>Smoking</b>                               | No                     | 1961           | 94,1 | 1894                 | 92,3 | 1788                  | 87,1 | 1697            | 79,3 | <b>7340</b>      | <b>88,1</b> | 2077           | 90,1 | 1909                  | 86,9 | 1826                   | 84,1 | 1602           | 76,4 | <b>7414</b>      | <b>84,5</b> |
|                                              | Yes                    | 122            | 5,9  | 158                  | 7,7  | 265                   | 12,9 | 444             | 20,7 | <b>989</b>       | <b>11,9</b> | 228            | 9,9  | 287                   | 13,1 | 346                    | 15,9 | 496            | 23,6 | <b>1357</b>      | <b>15,5</b> |
| <b>Leisure-time physical activity</b>        | Sedentary              | 152            | 7,3  | 176                  | 8,6  | 235                   | 11,5 | 391             | 18,4 | <b>954</b>       | <b>11,5</b> | 157            | 6,8  | 177                   | 8,1  | 186                    | 8,6  | 323            | 15,3 | <b>843</b>       | <b>9,6</b>  |
|                                              | Moderate               | 1469           | 70,6 | 1441                 | 70,2 | 1356                  | 66,1 | 1382            | 65,1 | <b>5648</b>      | <b>68,0</b> | 1730           | 75,2 | 1620                  | 73,7 | 1584                   | 73,1 | 1483           | 70,4 | <b>6417</b>      | <b>73,1</b> |
|                                              | Regular                | 460            | 22,1 | 436                  | 21,2 | 461                   | 22,5 | 349             | 16,4 | <b>1706</b>      | <b>20,5</b> | 414            | 18,0 | 401                   | 18,2 | 398                    | 18,4 | 300            | 14,2 | <b>1513</b>      | <b>17,2</b> |
| <b>BMI</b>                                   | Underweight/<br>normal | 730            | 35,2 | 700                  | 34,2 | 615                   | 30,1 | 620             | 29,4 | <b>2665</b>      | <b>32,2</b> | 1408           | 61,7 | 1273                  | 58,7 | 1205                   | 56,4 | 1120           | 54,1 | <b>5006</b>      | <b>57,8</b> |
|                                              | Overweight             | 1176           | 56,8 | 1147                 | 56,1 | 1193                  | 58,5 | 1225            | 58,1 | <b>4741</b>      | <b>57,4</b> | 702            | 30,8 | 747                   | 34,4 | 736                    | 34,5 | 739            | 35,7 | <b>2924</b>      | <b>33,8</b> |
|                                              | Obese                  | 165            | 8,0  | 198                  | 9,7  | 232                   | 11,4 | 264             | 12,5 | <b>859</b>       | <b>10,4</b> | 172            | 7,5  | 150                   | 6,9  | 195                    | 9,1  | 213            | 10,3 | <b>730</b>       | <b>8,4</b>  |
| <b>Decision Authority</b>                    | High                   | 2002           | 95,9 | 1580                 | 77,3 | 512                   | 24,8 | 163             | 7,6  | <b>4257</b>      | <b>51,0</b> | 2202           | 95,2 | 1410                  | 63,8 | 447                    | 20,5 | 284            | 13,4 | <b>4343</b>      | <b>49,2</b> |
|                                              | Low                    | 85             | 4,1  | 464                  | 22,7 | 1556                  | 75,2 | 1987            | 92,4 | <b>4092</b>      | <b>49,0</b> | 111            | 4,8  | 800                   | 36,2 | 1736                   | 79,5 | 1840           | 86,6 | <b>4487</b>      | <b>50,8</b> |

\*the number of cases shown for each covariate differs due to missing values

**Appendix 3 .** The association between heavy physical workload and risk of frequent musculoskeletal pain among baseline pain-free workers. Crude (OR) and adjusted odds-ratios (AOR) with 95% confidence intervals (CI,95%)

|                                      |                              | Pain-free workers - Men n=1430 |                   |                   |                   | Pain-free workers - Women n=1080 |                   |                   |                   |
|--------------------------------------|------------------------------|--------------------------------|-------------------|-------------------|-------------------|----------------------------------|-------------------|-------------------|-------------------|
|                                      |                              | Low                            | Medium-low        | Medium-high       | High              | Low                              | Medium-low        | Medium-high       | High              |
| <b>Physical load index</b>           | <i>Cases frequent pain/n</i> | 32/477                         | 17/383            | 19/338            | 14/232            | 25/324                           | 20/308            | 17/290            | 17/158            |
|                                      | OR (95 CI)                   | 1                              | 0.67 (0.36, 1.22) | 0.90 (0.50, 1.62) | 1.02 (0.53, 1.96) | 1                                | 0.85 (0.46, 1.57) | 0.77 (0.40, 1.45) | 1.54 (0.80, 2.97) |
|                                      | AOR <sup>a</sup> (95% CI)    | 1                              | 0.76 (0.42, 1.39) | 0.91 (0.43, 1.91) | 1.03 (0.42, 2.52) | 1                                | 0.73 (0.37, 1.43) | 0.56 (0.24, 1.27) | 0.92 (0.38, 2.25) |
|                                      | AOR <sup>b</sup> (95% CI)    | 1                              | 0.66 (0.35, 1.23) | 0.84 (0.39, 1.84) | 0.93 (0.35, 2.47) | 1                                | 0.59 (0.30, 1.17) | 0.42 (0.17, 0.99) | 0.59 (0.22, 1.56) |
| <b>Heavy lifting (at least 15kg)</b> | <i>Cases frequent pain/n</i> | 27/453                         | 21/387            | 23/354            | 11/236            | 22/302                           | 18/285            | 14/274            | 25/219            |
|                                      | OR (95 CI)                   | 1                              | 0.90 (0.50, 1.62) | 1.18 (0.66, 2.09) | 0.87 (0.42, 1.80) | 1                                | 0.88 (0.46, 1.69) | 0.72 (0.36, 1.43) | 1.69 (0.92, 3.09) |
|                                      | AOR <sup>a</sup> (95% CI)    | 1                              | 0.90 (0.50, 1.63) | 1.10 (0.58, 2.09) | 0.77 (0.32, 1.86) | 1                                | 0.87 (0.45, 1.67) | 0.71 (0.34, 1.51) | 1.53 (0.68, 3.49) |
|                                      | AOR <sup>b</sup> (95% CI)    | 1                              | 0.85 (0.46, 1.57) | 1.08 (0.55, 2.12) | 0.73 (1.28, 1.86) | 1                                | 0.80 (0.41, 1.55) | 0.62 (0.29, 1.32) | 1.34 (0.59, 3.08) |
| <b>Physically strenuous work</b>     | <i>Cases frequent pain/n</i> | 27/455                         | 23/420            | 19/321            | 15/234            | 26/321                           | 13/286            | 24/316            | 16/157            |
|                                      | OR (95 CI)                   | 1                              | 0.86 (0.48, 1.54) | 1.10 (0.60, 2.00) | 1.17 (0.60, 2.29) | 1                                | 0.55 (0.28, 1.09) | 0.95 (0.53, 1.70) | 1.37 (0.70, 2.64) |
|                                      | AOR <sup>a</sup> (95% CI)    | 1                              | 0.86 (0.48, 1.54) | 1.22 (0.57, 2.61) | 1.23 (0.54, 2.82) | 1                                | 0.54 (0.26, 1.11) | 0.78 (0.38, 1.61) | 1.06 (0.44, 2.33) |
|                                      | AOR <sup>b</sup> (95% CI)    | 1                              | 0.84 (0.46, 1.54) | 1.23 (0.56, 2.67) | 1.24 (0.51, 3.06) | 1                                | 0.55 (0.27, 1.13) | 0.78 (0.38, 1.59) | 0.89 (0.38, 2.07) |
| <b>Fast breathing</b>                | <i>Cases frequent pain/n</i> | 25/455                         | 23/420            | 19/321            | 15/234            | 25/309                           | 18/295            | 19/303            | 17/173            |
|                                      | OR (95 CI)                   | 1                              | 1.01 (0.56, 1.81) | 1.16 (0.63, 2.15) | 1.33 (0.68, 2.60) | 1                                | 0.75 (0.40, 1.40) | 0.78 (0.42, 1.45) | 1.30 (0.68, 2.49) |
|                                      | AOR <sup>a</sup> (95% CI)    | 1                              | 0.99 (0.55, 1.80) | 1.32 (0.64, 2.72) | 1.48 (0.66, 3.85) | 1                                | 0.77 (0.40, 1.47) | 0.64 (0.31, 1.30) | 0.93 (0.43, 2.00) |
|                                      | AOR <sup>b</sup> (95% CI)    | 1                              | 1.02 (0.56, 1.86) | 1.23 (0.58, 2.63) | 1.49 (0.61, 3.61) | 1                                | 0.83 (0.43, 1.58) | 0.61 (0.30, 1.26) | 0.84 (0.38, 1.82) |
| <b>Forward bent position</b>         | <i>Cases frequent pain/n</i> | 27/452                         | 23/433            | 22/326            | 10/219            | 25/288                           | 20/315            | 11/298            | 23/179            |
|                                      | OR (95 CI)                   | 1                              | 0.90 (0.51, 1.60) | 1.21 (0.67, 2.17) | 0.88 (0.41, 1.85) | 1                                | 0.74 (0.40, 1.36) | 0.41 (0.20, 0.85) | 1.63 (0.89, 2.98) |
|                                      | AOR <sup>a</sup> (95% CI)    | 1                              | 0.93 (0.52, 1.65) | 1.27 (0.57, 2.82) | 0.87 (0.32, 2.31) | 1                                | 0.67 (0.36, 1.26) | 0.27 (0.11, 0.67) | 0.95 (0.40, 2.24) |
|                                      | AOR <sup>b</sup> (95% CI)    | 1                              | 0.88 (0.48, 1.60) | 1.22 (0.53, 2.80) | 0.82 (0.29, 2.33) | 1                                | 0.59 (0.31, 1.12) | 0.27 (0.11, 0.67) | 0.85 (0.36, 2.03) |
| <b>Twisted position</b>              | <i>Cases frequent pain/n</i> | 25/468                         | 23/400            | 20/324            | 14/238            | 25/311                           | 18/302            | 18/275            | 18/192            |
|                                      | OR (95 CI)                   | 1                              | 1.10 (0.62, 1.98) | 1.26 (0.69, 2.31) | 1.23 (0.62, 2.44) | 1                                | 0.73 (0.39, 1.36) | 0.82 (0.44, 1.55) | 1.32 (0.64, 2.30) |
|                                      | AOR <sup>a</sup> (95% CI)    | 1                              | 1.26 (0.70, 2.27) | 1.50 (0.69, 3.26) | 1.45 (0.62, 3.40) | 1                                | 0.63 (0.32, 1.23) | 0.55 (0.23, 1.35) | 0.74 (0.29, 1.88) |
|                                      | AOR <sup>b</sup> (95% CI)    | 1                              | 1.14 (0.62, 2.10) | 1.42 (0.64, 3.21) | 1.42 (0.57, 3.57) | 1                                | 0.52 (0.26, 1.04) | 0.39 (0.15, 1.01) | 0.52 (0.19, 1.39) |
| <b>Hands above shoulder level</b>    | <i>Cases frequent pain/n</i> | 29/458                         | 20/407            | 14/324            | 19/241            | 24/307                           | 20/294            | 18/301            | 17/178            |
|                                      | OR (95 CI)                   | 1                              | 0.80 (0.44, 1.43) | 0.72 (0.38, 1.40) | 1.45 (0.79, 2.67) | 1                                | 0.87 (0.47, 1.62) | 0.77 (0.41, 1.44) | 1.32 (0.68, 2.54) |
|                                      | AOR <sup>a</sup> (95% CI)    | 1                              | 0.89 (0.49, 1.61) | 0.86 (0.40, 1.89) | 1.61 (0.73, 3.57) | 1                                | 0.80 (0.41, 1.56) | 0.47 (0.19, 1.14) | 0.73 (0.30, 1.79) |
|                                      | AOR <sup>b</sup> (95% CI)    | 1                              | 0.83 (0.45, 1.52) | 0.75 (0.33, 1.70) | 1.52 (0.64, 3.62) | 1                                | 0.73 (0.37, 1.42) | 0.51 (0.21, 1.23) | 0.63 (0.25, 1.60) |
| <b>Repetitive work</b>               | <i>Cases frequent pain/n</i> | 22/452                         | 24/367            | 23/367            | 13/244            | 20/330                           | 27/259            | 18/285            | 14/206            |
|                                      | OR (95 CI)                   | 1                              | 1.44 (0.79, 2.61) | 1.37 (0.75, 2.50) | 1.28 (0.63, 2.61) | 1                                | 1.83 (1.00, 3.36) | 1.07 (0.55, 2.07) | 1.19 (0.59, 2.43) |
|                                      | AOR <sup>a</sup> (95% CI)    | 1                              | 1.41 (0.78, 2.57) | 1.43 (0.77, 2.63) | 1.25 (0.57, 2.75) | 1                                | 1.86 (1.00, 3.50) | 1.25 (0.61, 2.38) | 0.76 (0.45, 1.38) |
|                                      | AOR <sup>b</sup> (95% CI)    | 1                              | 1.35 (0.73, 2.49) | 1.34 (0.71, 2.52) | 1.21 (0.53, 2.76) | 1                                | 1.46 (0.77, 2.79) | 0.91 (0.43, 1.94) | 0.75 (0.34, 1.65) |

| Frequent bending or twisting                                                                                                                                                    | Cases frequent pain/n     | 25/450 | 20/384            | 24/369            | 13/227            | 25/322 | 17/316            | 21/276            | 16/166            |
|---------------------------------------------------------------------------------------------------------------------------------------------------------------------------------|---------------------------|--------|-------------------|-------------------|-------------------|--------|-------------------|-------------------|-------------------|
|                                                                                                                                                                                 | OR (95% CI)               | 1      | 0.95 (0.52, 1.73) | 1.26 (0.71, 2.25) | 1.19 (0.59, 2.39) | 1      | 0.69 (0.36, 1.31) | 1.02 (0.55, 1.87) | 1.36 (0.70, 2.64) |
|                                                                                                                                                                                 | AOR <sup>a</sup> (95% CI) | 1      | 1.06 (0.58, 1.92) | 1.30 (0.69, 2.46) | 1.29 (0.55, 2.98) | 1      | 0.59 (0.29, 1.20) | 0.91 (0.47, 1.76) | 0.93 (0.41, 2.10) |
|                                                                                                                                                                                 | AOR <sup>b</sup> (95% CI) | 1      | 0.95 (0.52, 1.76) | 1.30 (0.67, 2.51) | 1.30 (0.52, 3.16) | 1      | 0.53 (0.26, 1.08) | 0.54 (0.26, 1.16) | 0.54 (0.21, 1.37) |
| Crude analysis adjusted for age                                                                                                                                                 |                           |        |                   |                   |                   |        |                   |                   |                   |
| AOR <sup>a</sup> adjusted for age, long term health condition, psychological distress, smoking, BMI, leisure-time physical activity and decision authority                      |                           |        |                   |                   |                   |        |                   |                   |                   |
| AOR <sup>b</sup> adjusted for age, completed education, long term health condition, psychological distress, smoking, BMI, leisure-time physical activity and decision authority |                           |        |                   |                   |                   |        |                   |                   |                   |

**Appendix 4 .** The association between overall heavy physical workload and risk of frequent musculoskeletal pain among workers that did not change exposure throughout the follow-up period. Crude (OR) and adjusted odds-ratios (AOR) with 95% confidence intervals (CI,95%)

|                                                                                                                                                                                 |                           | Male workers with occasional pain n=1962 (25% excluded from main sample, n = 727) |                   |                   |                  | Female workers with occasional pain n=2394 (15% excluded from main sample, n = 430) |                  |                  |                  |
|---------------------------------------------------------------------------------------------------------------------------------------------------------------------------------|---------------------------|-----------------------------------------------------------------------------------|-------------------|-------------------|------------------|-------------------------------------------------------------------------------------|------------------|------------------|------------------|
|                                                                                                                                                                                 |                           | Low                                                                               | Medium-low        | Medium-high       | High             | Low                                                                                 | Medium-low       | Medium-high      | High             |
| Physical load index                                                                                                                                                             | Cases frequent pain/n     | 67/558                                                                            | 57/479            | 59/432            | 75/493           | 108/796                                                                             | 74/528           | 103/545          | 113/525          |
|                                                                                                                                                                                 | OR (95% CI)               | 1                                                                                 | 1.03 (0.70, 1.50) | 1.29 (0.88,1.88)  | 1.42 (1.00,2.04) | 1                                                                                   | 1.05 (0.76,1.44) | 1.52(1.13,2.04)  | 1.80(1.34,2.42)  |
|                                                                                                                                                                                 | AOR <sup>a</sup> (95% CI) | 1                                                                                 | 0.99 (0.68, 1.46) | 1.16 (0.71, 1.90) | 1.36 (0.82,2.26) | 1                                                                                   | 1.14 (0.84,1.53) | 1.38 (0.95,2.01) | 1.58 (1.08,2.30) |
|                                                                                                                                                                                 | AOR <sup>b</sup> (95% CI) | 1                                                                                 | 0.94 (0.63,1.41)  | 1.05 (0.63,1.77)  | 1.18 (0.68,2.05) |                                                                                     | 1.12 (0.82,1.51) | 1.36 (0.92,1.99) | 1.52 (1.01,2.27) |
| Crude analysis adjusted for age                                                                                                                                                 |                           |                                                                                   |                   |                   |                  |                                                                                     |                  |                  |                  |
| AOR <sup>a</sup> adjusted for age, long term health condition, psychological distress, smoking, BMI, leisure-time physical activity and decision authority                      |                           |                                                                                   |                   |                   |                  |                                                                                     |                  |                  |                  |
| AOR <sup>b</sup> adjusted for age, completed education, long term health condition, psychological distress, smoking, BMI, leisure-time physical activity and decision authority |                           |                                                                                   |                   |                   |                  |                                                                                     |                  |                  |                  |
